# Supplementary material for: Human pluripotent embryonal carcinoma NTERA2 cl.D1 cells maintain their typical morphology in an angiomyogenic medium
Source: Springer Nature journal article supplement (doi:10.1186/1477-5751-6-5), 2007-04-18
Supplement: Additional file 3 [file 1477-5751-6-5-s3.doc]

**Additional file 3**

**Human pluripotent embryonal carcinoma NT2/D1 in an**

**angiomyogenic medium. The case of the MYH7 PCR**


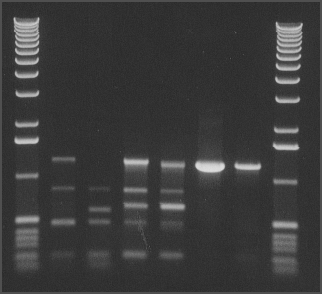


1 Kb Ladder

UCB

Hyppocampus

RH30

NT2

Left Ventricle

Masseter

1 Kb Ladder

**1**

**2**

**3**

**4**

**5**

| **Band** | **Gene** | **Chr** |
| --- | --- | --- |
| **1** | Tubulin Tyrosin Ligase Like 9 (TTLL9) intron | 20 |
| **2** | Repeat elements (MIR, AluSx, L2) | 8 |
| **3** | Fatty Acid Desaturase 1(FADS1) | 11 |
| **4** | Unknown region | 2 |
| **5** | Not sequenced | - |
