# Supplementary figures and images for: Human pluripotent embryonal carcinoma NTERA2 cl.D1 cells maintain their typical morphology in an angiomyogenic medium
Source: Springer Nature journal article supplement (doi:10.1186/1477-5751-6-5), 2007-04-18

**Additional file 2**

**Human pluripotent embryonal carcinoma NT2/D1 in an angiomyogenic medium**


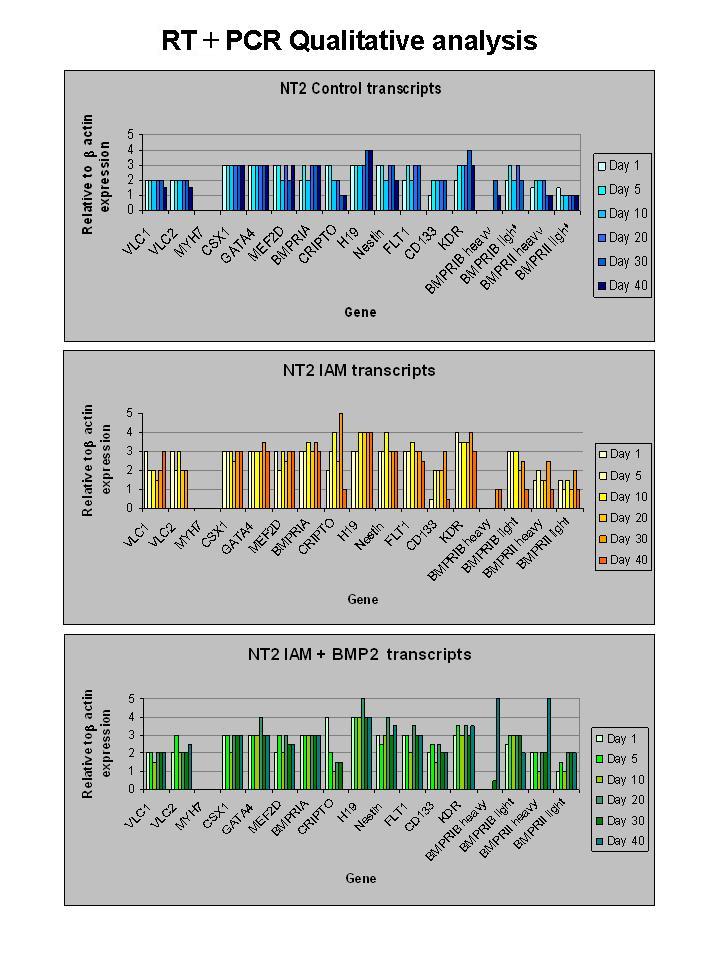

Supplement: Additional file 2 [file 1477-5751-6-5-s2.doc]

**
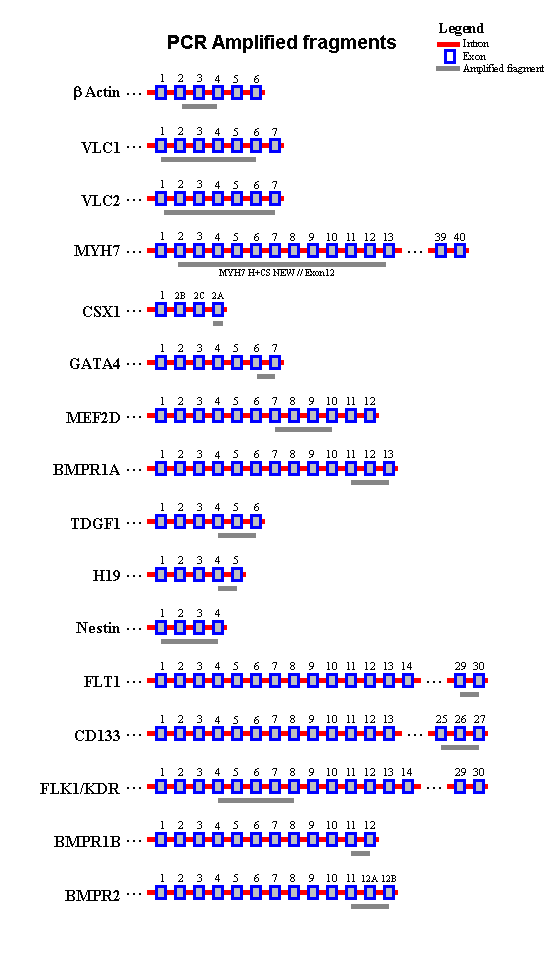
**

**Additional file 5**

**Diagram of the NT2/D1 Transcripts**

Supplement: Additional file 5 [file 1477-5751-6-5-s5.doc]
